# Supplementary material
Source: MDPI journal article supplement (https://www.mdpi.com/2673-1924/3/3/17)
Supplement: s1 [file s1 › oceans-1655621-supplementary.pdf]

## Supplemental information

**Table S1.** Urinary mono(2-ethylhexyl) phthalate (MEHP) concentrations from Sarasota Bay common bottlenose dolphins (*Tursiops truncatus*) sampled more than once, with at least one sampling event occurring in 2014 or 2015. All dolphins were sampled once per year with the exception of dolphin 4 which was sampled twice during 2012.

| Year | Dolphin 1 MEHP concentrations (ng/mL) | Dolphin 2 MEHP concentrations (ng/mL) | Dolphin 3 MEHP concentrations (ng/mL) | Dolphin 4 MEHP concentrations (ng/mL) |
|------|---------------------------------------|---------------------------------------|---------------------------------------|---------------------------------------|
| 2010 | -                                     | -                                     | -                                     | -                                     |
| 2011 | -                                     | <LOD <sup>+</sup>                     | -                                     | -                                     |
| 2012 | -                                     | -                                     | 1.28                                  | 1.83, 4.14                            |
| 2013 | -                                     | -                                     | -                                     | -                                     |
| 2014 | 63.5                                  | 27.1                                  | 0.46                                  | 43.39                                 |
| 2015 | 30.29                                 | -                                     | -                                     | -                                     |
| 2016 | -                                     | -                                     | -                                     | -                                     |
| 2017 | -                                     | -                                     | 1.7                                   | -                                     |
| 2018 | -                                     | -                                     | -                                     | <LOD <sup>+</sup>                     |
| 2019 | -                                     | -                                     | -                                     | -                                     |

\*Indicates the sample used for analysis

<sup>+</sup>LOD = 0.25 ng/mL
